# Supplementary material
Source: ML conference proceedings conference paper supplement (https://aclanthology.org/2025.llmsec-1.5)
Supplement: SupplementaryMaterial [file 2025.llmsec-1.5.SupplementaryMaterial.zip]

**Real  
Prompt**

Tiffany baked 8 brownies, but needed 17 total for her party. If she used 8 cups of flour on each one, how many cups of flour does she still need?

**Noisy  
Prompt**

? Tiffany baked 8 brownies, but needed 17 ! total for ; her party. If she : used 8 cups of flour on each one, how many cups of flour does she still need?

72

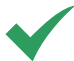

8

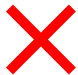

LLM Response
