# Supplementary material
Source: ML conference proceedings conference paper supplement (https://aclanthology.org/2025.llmsec-1.5)

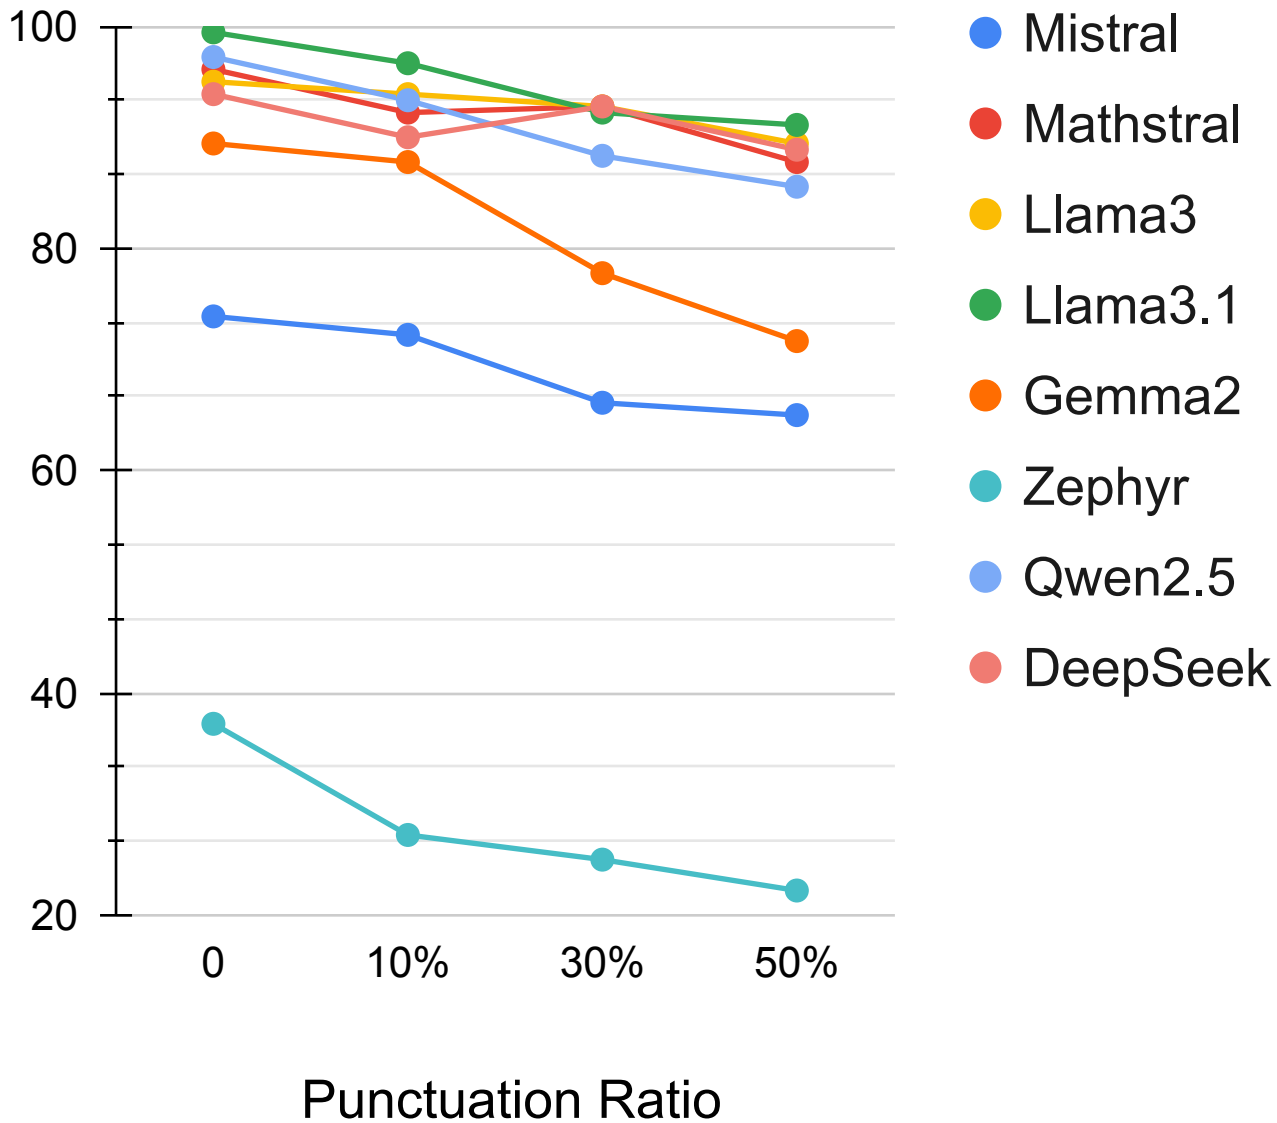

Supplement: SupplementaryMaterial [file 2025.llmsec-1.5.SupplementaryMaterial.zip]

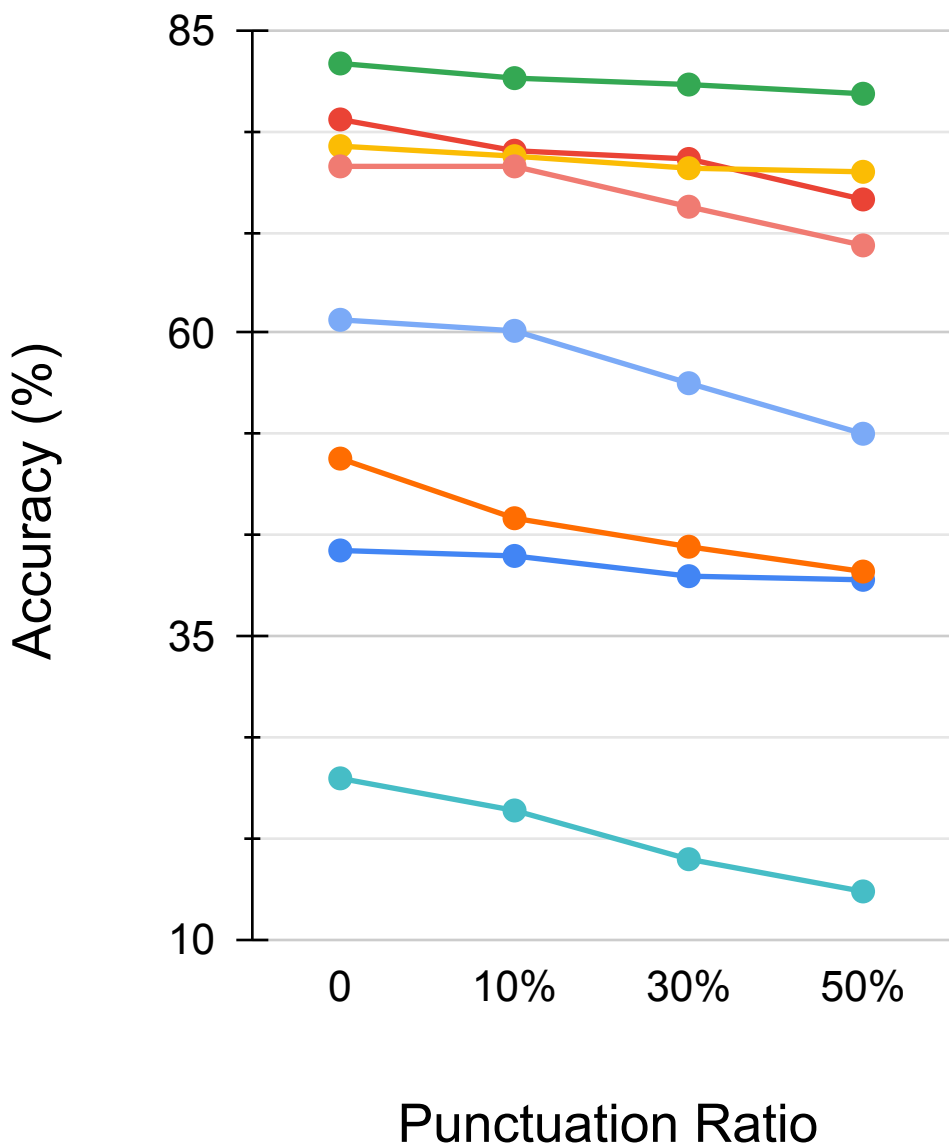

Supplement: SupplementaryMaterial [file 2025.llmsec-1.5.SupplementaryMaterial.zip]

GSM8K MultiArith

Attack Success Rate (%)

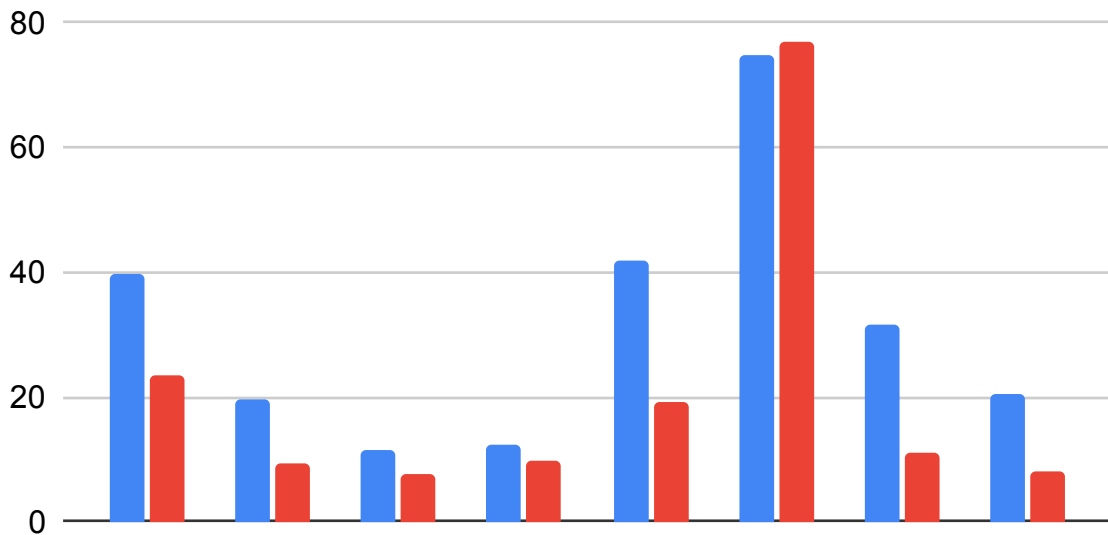

Models

Supplement: SupplementaryMaterial [file 2025.llmsec-1.5.SupplementaryMaterial.zip]
